# Supplementary material for: DNA Methylation Profiles of Blood Cells Are Distinct between Early-Onset Obese and Control Individuals
Source: PubMed Central journal article supplement — Genomics Inform. 2017 Mar 29;15(1):28–37. doi: 10.5808/GI.2017.15.1.28 (PMC5389946; doi:10.5808/gi.2017.15.1.28), 2017-03-29
Supplement: gni-15-28-s001.pdf [file gni-15-28-s001.pdf]

## SUPPLEMENTARY INFORMATION

### **DNA Methylation Profiles of Blood Cells Are Distinct between Early-Onset Obese and Control Individuals**

**Je-Keun Rhee<sup>1</sup>, Jin-Hee Lee<sup>2</sup>, Hae Kyung Yang<sup>3</sup>, Tae-Min Kim<sup>1\*</sup>, Kun-Ho Yoon<sup>1,2,3\*\*</sup>**

<sup>1</sup>Department of Medical Informatics, College of Medicine, The Catholic University of Korea, Seoul 06591, Korea, <sup>2</sup>Catholic Institute of U-Healthcare, Institute of Biomedical Industry, The Catholic University of Korea, Seoul 06591, Korea, <sup>3</sup>Department of Internal Medicine, College of Medicine, The Catholic University of Korea, Seoul 06591, Korea

**Supplementary Table 1.** Expression comparison of genes with significant enrichment of differentially methylated CpGs

| Symbol          | p-value  | FDR      |
|-----------------|----------|----------|
| <i>C21orf56</i> | 0.030503 | 0.957686 |
| <i>ZNF154</i>   | 0.040895 | 0.957686 |
| <i>SDK1</i>     | 0.23544  | 0.965175 |
| <i>KIAA0146</i> | 0.289321 | 0.965318 |
| <i>SKIV2L</i>   | 0.094446 | 0.957686 |
| <i>GPR125</i>   | 0.819418 | 0.99262  |
| <i>SORBS2</i>   | 0.885967 | 0.997319 |
| <i>C14orf70</i> | 0.816179 | 0.992498 |
| <i>POLR3E</i>   | 0.765737 | 0.989988 |
| <i>CTBP2</i>    | 0.080374 | 0.957686 |
| <i>DLGAP2</i>   | 0.224745 | 0.962153 |
| <i>CAPS2</i>    | 0.588693 | 0.986149 |
| <i>GIMAP1</i>   | 0.140035 | 0.957686 |
| <i>RNF213</i>   | 0.547384 | 0.982494 |
| <i>MND1</i>     | 0.954998 | 0.999836 |
| <i>SRM</i>      | 0.070763 | 0.957686 |
| <i>TGM6</i>     | 0.506865 | 0.977098 |
| <i>WDR27</i>    | 0.124784 | 0.957686 |

FDR, false discovery rate.
