# Supplementary material for: DNA Methylation Profiles of Blood Cells Are Distinct between Early-Onset Obese and Control Individuals
Source: PubMed Central journal article supplement — Genomics Inform. 2017 Mar 29;15(1):28–37. doi: 10.5808/GI.2017.15.1.28 (PMC5389946; doi:10.5808/gi.2017.15.1.28), 2017-03-29
Supplement: gni-15-28-s002.pdf [file gni-15-28-s002.pdf]

## SUPPLEMENTARY INFORMATION

### **DNA Methylation Profiles of Blood Cells Are Distinct between Early-Onset Obese and Control Individuals**

**Je-Keun Rhee<sup>1</sup>, Jin-Hee Lee<sup>2</sup>, Hae Kyung Yang<sup>3</sup>, Tae-Min Kim<sup>1\*</sup>, Kun-Ho Yoon<sup>1,2,3\*\*</sup>**

<sup>1</sup>Department of Medical Informatics, College of Medicine, The Catholic University of Korea, Seoul 06591, Korea, <sup>2</sup>Catholic Institute of U-Healthcare, Institute of Biomedical Industry, The Catholic University of Korea, Seoul 06591, Korea, <sup>3</sup>Department of Internal Medicine, College of Medicine, The Catholic University of Korea, Seoul 06591, Korea

**Supplementary Table 2.** Differentially expressed genes

| Symbol              | p-value     | FDR         |
|---------------------|-------------|-------------|
| <i>GNG7</i>         | 5.43E-05    | 0.913233955 |
| <i>LOC400890</i>    | 0.00010231  | 0.913233955 |
| <i>RTN4</i>         | 0.000123827 | 0.913233955 |
| <i>HDAC2</i>        | 0.000151315 | 0.913233955 |
| <i>REEP5</i>        | 0.000164331 | 0.913233955 |
| <i>MIR30A</i>       | 0.000236918 | 0.913233955 |
| <i>TMOD1</i>        | 0.000237557 | 0.913233955 |
| <i>XPR1</i>         | 0.000252695 | 0.913233955 |
| <i>COL4A1</i>       | 0.000261597 | 0.913233955 |
| <i>MSX2</i>         | 0.000294059 | 0.923903924 |
| <i>UTP23</i>        | 0.000345272 | 0.957686345 |
| <i>BCL9</i>         | 0.000440861 | 0.957686345 |
| <i>MAP1LC3C</i>     | 0.000461436 | 0.957686345 |
| <i>LOC644682</i>    | 0.000461498 | 0.957686345 |
| <i>BTF3L4</i>       | 0.000476407 | 0.957686345 |
| <i>MTPN</i>         | 0.00050862  | 0.957686345 |
| <i>LOC646278</i>    | 0.000588438 | 0.957686345 |
| <i>PTPN12</i>       | 0.000598659 | 0.957686345 |
| <i>LOC284023</i>    | 0.000614055 | 0.957686345 |
| <i>LOC729510</i>    | 0.000618711 | 0.957686345 |
| <i>HIST1H3G</i>     | 0.000654751 | 0.957686345 |
| <i>TRIM69</i>       | 0.000700616 | 0.957686345 |
| <i>STON1</i>        | 0.000764487 | 0.957686345 |
| <i>LOC652579</i>    | 0.000808139 | 0.957686345 |
| <i>DTL</i>          | 0.000815974 | 0.957686345 |
| <i>LOC652127</i>    | 0.000847992 | 0.957686345 |
| <i>LOC647850</i>    | 0.000904861 | 0.957686345 |
| <i>DYRK1A</i>       | 0.000942617 | 0.957686345 |
| <i>DECR2</i>        | 0.000947844 | 0.957686345 |
| <i>LOC100132964</i> | 0.000992485 | 0.957686345 |

FDR, false discovery rate.
