# Supplementary material for: DNA Methylation Profiles of Blood Cells Are Distinct between Early-Onset Obese and Control Individuals
Source: PubMed Central journal article supplement — Genomics Inform. 2017 Mar 29;15(1):28–37. doi: 10.5808/GI.2017.15.1.28 (PMC5389946; doi:10.5808/gi.2017.15.1.28), 2017-03-29
Supplement: gni-15-28-s004.pdf [file gni-15-28-s004.pdf]

## SUPPLEMENTARY INFORMATION

### **DNA Methylation Profiles of Blood Cells Are Distinct between Early-Onset Obese and Control Individuals**

**Je-Keun Rhee<sup>1</sup>, Jin-Hee Lee<sup>2</sup>, Hae Kyung Yang<sup>3</sup>, Tae-Min Kim<sup>1\*</sup>, Kun-Ho Yoon<sup>1,2,3\*\*</sup>**

<sup>1</sup>Department of Medical Informatics, College of Medicine, The Catholic University of Korea, Seoul 06591, Korea, <sup>2</sup>Catholic Institute of U-Healthcare, Institute of Biomedical Industry, The Catholic University of Korea, Seoul 06591, Korea, <sup>3</sup>Department of Internal Medicine, College of Medicine, The Catholic University of Korea, Seoul 06591, Korea

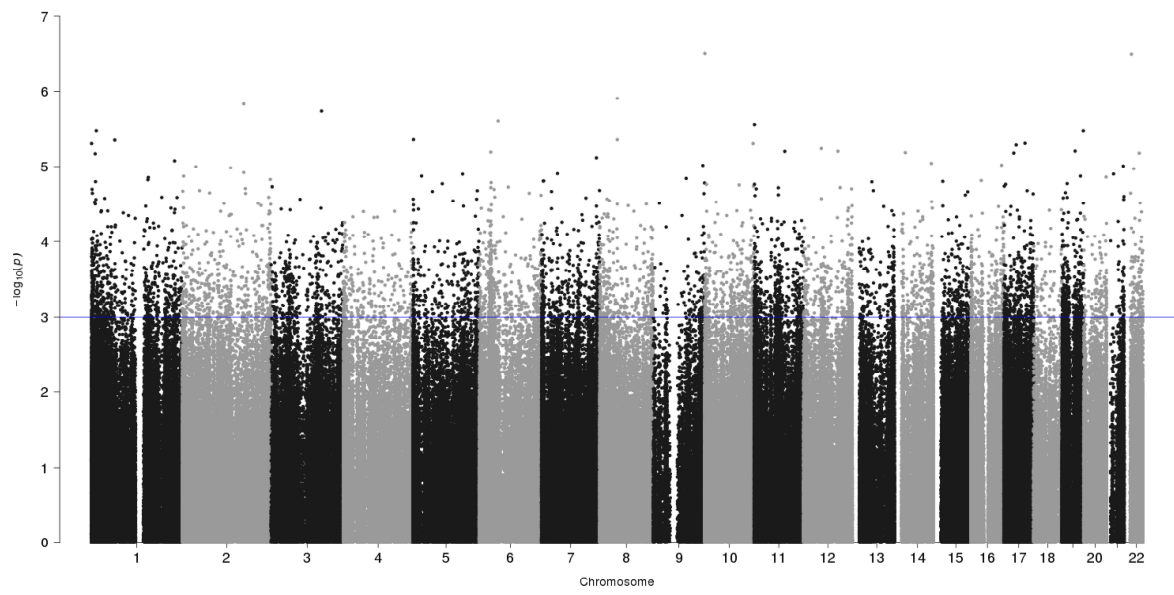

**Supplementary Fig. 2.** Manhattan plot for the significance of the differentially methylated CpG sites. Blue line represents the significance level or p-value of 0.001.
