# Supplementary material for: DNA Methylation Profiles of Blood Cells Are Distinct between Early-Onset Obese and Control Individuals
Source: PubMed Central journal article supplement — Genomics Inform. 2017 Mar 29;15(1):28–37. doi: 10.5808/GI.2017.15.1.28 (PMC5389946; doi:10.5808/gi.2017.15.1.28), 2017-03-29
Supplement: gni-15-28-s005.pdf [file gni-15-28-s005.pdf]

## SUPPLEMENTARY INFORMATION

### **DNA Methylation Profiles of Blood Cells Are Distinct between Early-Onset Obese and Control Individuals**

**Je-Keun Rhee<sup>1</sup>, Jin-Hee Lee<sup>2</sup>, Hae Kyung Yang<sup>3</sup>, Tae-Min Kim<sup>1\*</sup>, Kun-Ho Yoon<sup>1,2,3\*\*</sup>**

<sup>1</sup>Department of Medical Informatics, College of Medicine, The Catholic University of Korea, Seoul 06591, Korea, <sup>2</sup>Catholic Institute of U-Healthcare, Institute of Biomedical Industry, The Catholic University of Korea, Seoul 06591, Korea, <sup>3</sup>Department of Internal Medicine, College of Medicine, The Catholic University of Korea, Seoul 06591, Korea

|                  | TSS1500 | TSS200 | 5UTR | 1stExon | Body | 3UTR | p-value  |
|------------------|---------|--------|------|---------|------|------|----------|
| <i>MIR1185-2</i> | 1       | 1      |      |         | 1    |      | 3.17E-06 |
| <i>C21orf56</i>  |         |        | 4    |         | 1    |      | 7.97E-07 |
| <i>ZNF154</i>    | 1       | 1      | 1    |         |      |      | 1.41E-05 |
| <i>SDK1</i>      |         |        |      |         | 13   |      | 2.91E-05 |
| <i>KIAA0146</i>  | 3       |        |      |         | 3    |      | 3.34E-05 |
| <i>SKIV2L</i>    |         |        | 1    |         | 5    |      | 3.84E-05 |
| <i>GPR125</i>    |         |        |      |         | 4    |      | 5.58E-05 |
| <i>SORBS2</i>    |         |        | 3    |         | 4    |      | 7.17E-05 |
| <i>C14orf70</i>  | 1       | 1      |      |         | 1    |      | 1.06E-04 |
| <i>POLR3E</i>    | 1       |        | 1    |         | 2    |      | 2.28E-04 |
| <i>CTBP2</i>     |         |        | 4    |         | 3    |      | 2.67E-04 |
| <i>DLGAP2</i>    |         |        | 2    |         | 7    |      | 3.05E-04 |
| <i>CAPS2</i>     | 1       |        |      |         | 4    |      | 4.60E-04 |
| <i>FLJ39609</i>  | 3       |        |      |         |      |      | 4.79E-04 |
| <i>GIMAP1</i>    |         |        |      |         | 3    |      | 4.79E-04 |
| <i>RNF213</i>    |         |        | 1    |         | 5    |      | 5.46E-04 |
| <i>MND1</i>      | 1       |        |      |         | 2    |      | 6.32E-04 |
| <i>SRM</i>       |         |        |      | 1       | 1    | 1    | 6.32E-04 |
| <i>CELA2A</i>    |         | 1      | 1    |         |      |      | 6.41E-04 |
| <i>TGM6</i>      |         |        |      |         | 4    |      | 8.12E-04 |
| <i>WDR27</i>     |         |        |      |         | 6    |      | 9.77E-04 |

**Supplementary Fig. 3.** Genes significantly enriched with CpGs differentially methylated between obese and control individuals. The number in each cell is the number of the differentially methylated CpGs in the corresponding genomic region. Red and blue represent obese-hypermethylated and obese-hypomethylated CpGs, respectively. TSS1500, 1,500 bp regions upstream of the transcription start site; TSS200, 200 bp regions upstream of the transcription start site; UTR, untranslated region.
